# Supplementary material
Source: PubMed Central journal article supplement (PMC2771090)
Supplement: emboj2009254s6.pdf [file emboj2009254s6.pdf]

Manuscript EMBO-2009-71224

## **Myc-regulated microRNAs attenuate embryonic stem cell differentiation**

Chin-Hsing Lin, Aimee Jackson, Jie Guo, Peter Linsley

*Corresponding author: Robert Eisenman, Fred Hutchinson Cancer Research Center*

---

### **Review timeline:**

Submission date:

27 April 2009

Accepted:

23 July 2009

---

No Review Process File is available with this article, as the authors have chosen not to make the review process public in this case.
